# Supplementary material
Source: publisher site journal article supplement (https://www.spandidos-publications.com/2401/downloadSupplementary)
Supplement: Supplementary file 1 [file downloadSupplementary]

## Sheet: Sheet1
Table SIV. Functional analysis of single nucleotide polymorphisms using PhenoScanner in genome-wide association studies.
A, rs191188930
Trait	PMID	Beta	P-value	Samples
Cause of death: car occupant injured in unspecified traffic accident	UKBB	-0.04853	1.82×10-11	7637
Cause of death: heart failure, unspecified	UKBB	-0.04522	3.90×10-10	7637
Cause of death: asthma, unspecified	UKBB	-0.04768	4.96×10-10	7637
Treatment with iron product	UKBB	-0.009634	8.69×10-7	337159
Hypofunction and other disorders of pituitary gland	UKBB	-0.003157	3.18×10-6	337199
Treatment with pariet 10mg e or c tablet	UKBB	-0.00439	4.40×10-6	337159
Paralytic strabismus	UKBB	-0.002471	1.41×10-5	337199
Urticaria	UKBB	-0.002614	2.55×10-5	337199
Treatment with antihypertensive	UKBB	-0.002076	3.32×10-5	337159
Other disorders of conjunctiva	UKBB	-0.004329	4.41×10-5	337199
Treatment with indoramin	UKBB	-0.002452	4.46×10-5	337159
Neoplasm of uncertain or unknown behaviour of female genital organs	UKBB	-0.002456	1.46×10-4	337199
Cause of death: interstitial pulmonary disease, unspecified	UKBB	-0.04124	2.14×10-4	7637
Cause of death: bronchiectasis	UKBB	-0.04542	2.81×10-4	7637
Treatment with testosterone product	UKBB	-0.003362	3.65×10-4	337159
Zoster	UKBB	-0.002385	4.07×10-4	337199
Cause of death: hypertensive heart disease without heart failure	UKBB	-0.04765	4.23×10-4	7637
Treatment with sildenafil	UKBB	-0.005452	7.92×10-4	337159
Treatment with naramig 2.5mg tablet	UKBB	-0.003324	8.67×10-4	337159
Self-reported pleurisy	UKBB	-0.007092	8.96×10-4	337159
Acute pericarditis	UKBB	-0.002147	1.19×10-3	337199
Self-reported bladder problem	UKBB	-0.009218	1.27×10-3	337159
Other aplastic anaemias	UKBB	-0.001632	1.44×10-3	337199
Heart failure	UKBB	-0.005006	1.63×10-3	337199
Cause of death: other and unspecified cirrhosis of liver	UKBB	-0.0446	2.02×10-3	7637
Female infertility	UKBB	-0.004741	2.16×10-3	337199
Cause of death: abdominal aortic aneurysm, ruptured	UKBB	-0.04494	2.17×10-3	7637
Types of physical activity in last 4 weeks: walking for pleasure	UKBB	0.05096	2.24×10-3	335599
Treatment with orlistat	UKBB	-0.003808	2.37×10-3	337159
Self-reported acute infective polyneuritis or guillain-barre syndrome	UKBB	-0.002404	2.49×10-3	337159
Acute appendicitis	UKBB	-0.007889	2.56×10-3	337199
Treatment with logynon tablet	UKBB	-0.002276	2.75×10-3	337159
Treatment with mucodyne 375mg capsule	UKBB	-0.002102	3.08×10-3	337159
Malignant neoplasm of cervix uteri	UKBB	-0.002268	3.26×10-3	337199
Treatment with lisinopril+hydrochlorothiazide 10mg or 12.5mg tablet	UKBB	-0.001953	4.29×10-3	337159
Complications and ill-defined descriptions of heart disease	UKBB	-0.002242	4.37×10-3	337199
Cause of death: malignant neoplasm of rectosigmoid junction	UKBB	-0.06857	4.95×10-3	7637
Cause of death: dissection of aorta	UKBB	-0.04523	5.09×10-3	7637
Mouth or teeth dental problems: mouth ulcers	UKBB	0.03144	5.39×10-3	336138
Treatment with calcium carbonate+cholecalciferol 1.25g or 5micrograms tablet	UKBB	-0.002032	5.76×10-3	337159
Self-reported fracture hand	UKBB	-0.002302	5.97×10-3	337159
Treatment with dermovate cream	UKBB	-0.003988	5.98×10-3	337159
Ascites	UKBB	-0.002014	6.99×10-3	337199
Aortic aneurysm and dissection	UKBB	-0.002935	7.39×10-3	337199
Self-reported rodent ulcer	UKBB	-0.003749	7.70×10-3	337159
Treatment with iron+folic acid	UKBB	-0.00217	7.95×10-3	337159
Treatment with brimonidine tartrate	UKBB	-0.001641	8.21×10-3	337159
Other necrotising vasculopathies	UKBB	-0.002224	8.46×10-3	337199
Procreative management	UKBB	-0.002166	8.65×10-3	337199
Treatment with fosinopril	UKBB	-0.002159	8.86×10-3	337159
Inflammatory polyneuropathy	UKBB	-0.001863	9.00×10-3	337199
Open wound of forearm	UKBB	-0.001794	9.60×10-3	337199
Tubulo-interstitial nephritis, not specified as acute or chronic	UKBB	-0.003059	9.77×10-3	337199
Treatment with volsaid retard 75mg m or r tablet	UKBB	-0.001323	9.80×10-3	337159
B, rs142136033
Trait	PMID	Beta	P-value	Samples
Cause of death: heart failure, unspecified	UKBB	-0.06292	2.68×10-14	7637
Cause of death: car occupant injured in unspecified traffic accident	UKBB	-0.05852	1.43×10-12	7637
Other disorders of urethra	UKBB	-0.007883	2.15×10-12	337199
Fracture of neck	UKBB	-0.003925	1.26×10-7	337199
Treatment with loestrin 20 tablet	UKBB	-0.004189	9.81×10-7	337159
Enthesopathies of lower limb, excluding foot	UKBB	-0.004325	2.70×10-6	337199
Acute tubulo-interstitial nephritis	UKBB	-0.002989	5.13×10-6	337199
Cause of death: hypertensive heart disease with heart failure	UKBB	-0.06149	7.32×10-6	7637
Self-reported chronic myeloid	UKBB	-0.00263	4.46×10-5	337159
Pain and other conditions associated with female genital organs and menstrual cycle	UKBB	-0.008955	5.50×10-5	337199
Self-reported lichen sclerosis	UKBB	-0.002892	1.06×10-4	337159
Unspecified renal colic	UKBB	-0.008664	2.32×10-4	337199
Treatment with zirtek allergy 10mg tablet	UKBB	-0.002461	3.74×10-4	337159
Self-reported neurological injury or trauma	UKBB	-0.002398	4.02×10-4	337159
Treatment with carvedilol	UKBB	-0.003586	6.04×10-4	337159
False labour	UKBB	-0.006324	9.08×10-4	337199
Other neoplasms of uncertain or unknown behaviour of lymphoid, haematopoietic and related tissue	UKBB	-0.002606	9.34×10-4	337199
Self-reported other renal or kidney problem	UKBB	-0.00856	1.02×10-3	337159
Self-reported macular degeneration	UKBB	-0.00313	1.12×10-3	337159
Treatment with mucodyne 375mg capsule	UKBB	-0.002522	1.14×10-3	337159
Treatment with normacol granules	UKBB	-0.00274	1.42×10-3	337159
Spontaneous abortion	UKBB	-0.00687	2.10×10-3	337199
Impedance of leg left	UKBB	0.1134	2.12×10-3	331296
Treatment with tiotropium	UKBB	-0.006142	2.34×10-3	337159
Treatment with dexamethasone+hypromellose 0.1% or 0.5% eye drops	UKBB	-0.002457	2.57×10-3	337159
Treatment with phyllocontin continus 225mg m or r tablet	UKBB	-0.002341	2.96×10-3	337159
Other benign neoplasms of skin	UKBB	-0.009905	3.51×10-3	337199
Treatment with hormonin tablet	UKBB	-0.002283	3.74×10-3	337159
Self-reported trapped nerve or compressed nerve	UKBB	-0.006383	3.78×10-3	337159
Transient cerebral ischaemic attacks and related syndromes	UKBB	-0.00678	3.79×10-3	337199
Number of trend entries	UKBB	-0.2822	4.50×10-3	49623
Benign neoplasm of other and ill-defined parts of digestive system	UKBB	-0.00444	5.17×10-3	337199
Treatment with zanidip 10mg tablet	UKBB	-0.002411	5.59×10-3	337159
Treatment with kelp+garlic product	UKBB	-0.00261	5.75×10-3	337159
Duration of fitness test	UKBB	-0.1965	6.36×10-3	49623
Time spent driving	UKBB	-0.1002	6.43×10-3	224813
Benign neoplasm of urinary organs	UKBB	-0.001468	7.17×10-3	337199
Other diseases of spinal cord	UKBB	-0.002393	7.86×10-3	337199
Treatment with efexor 37.5mg tablet	UKBB	-0.002428	8.06×10-3	337159
Treatment with fosinopril	UKBB	-0.002364	8.65×10-3	337159
Risk taking	UKBB	-0.0463	8.66×10-3	325821
Urea	28887542	-0.15	9.36×10-3	9961
Poisoning by narcotics and psychodysleptics	UKBB	-0.002422	9.79×10-3	337199
C, rs870064
Trait	PMID	Beta	P-value	Samples
Cause of death: heart failure, unspecified	UKBB	-0.009412	2.58×10-8	7637
Cause of death: other ill-defined and unspecified causes of mortality	UKBB	-0.01562	3.47×10-5	7637
Other inflammatory spondylopathies	UKBB	-0.0006525	2.76×10-4	337199
Why stopped smoking: health precaution	UKBB	-0.02584	1.17×10-3	82082
Types of transport used, excluding work: walk	UKBB	-0.01287	1.39×10-3	335650
Cause of death: cerebral infarction, unspecified	UKBB	-0.01083	1.88×10-3	7637
Cause of death: urinary tract infection, site not specified	UKBB	-0.008122	2.37×10-3	7637
Serous boarderline ovarian cancer	28346442	-0.3603	2.62×10-3	42895
Cardiac arrest	UKBB	-0.000374	2.85×10-3	337199
Treatment with dothiepin	UKBB	-0.0004825	3.01×10-3	337159
Treatment with sodium cromoglicate	UKBB	0.0006853	3.09×10-3	337159
Labour and delivery complicated by umbilical cord complications	UKBB	-0.0004582	3.44×10-3	337199
Knee surgery or amputation above the knee	UKBB	-0.004414	3.70×10-3	24008
Illnesses of siblings: parkinsons disease	UKBB	0.001852	3.92×10-3	259979
Number of self-reported cancers	UKBB	0.00712	4.41×10-3	337154
Treatment with calfovit d3 powder for oral suspension	UKBB	-0.0003047	4.50×10-3	337159
Disturbances of skin sensation	UKBB	-0.001001	4.67×10-3	337199
Otitis externa	UKBB	0.0005741	4.87×10-3	337199
Secondary malignant neoplasm of other sites	UKBB	0.0007756	6.18×10-3	337199
Gonarthrosis	UKBB	0.00302	6.53×10-3	337199
Waist circumeference in physically active males	28448500	-0.0803	7.23×10-3	59007
Maternal smoking around birth	UKBB	0.01064	7.39×10-3	289727
Other disorders of gingiva and edentulous alveolar ridge	UKBB	-0.0004142	7.70×10-3	337199
Vitamin and mineral supplements: multivitamins + or - minerals	UKBB	-0.008758	7.85×10-3	335591
Low grade and borderline serous ovarian cancer	28346442	-0.2675	7.86×10-3	43907
Statin response difference triglycerides	20339536	NA	8.38×10-3	3932
Triglycerides change with statins	20339536	NA	8.38×10-3	3928
Current employment status: looking after home and or or family	UKBB	-0.004545	8.46×10-3	336252
Self-reported insomnia	UKBB	-0.000652	8.56×10-3	337159
Waist hip ratio in physically active females	28448500	0.0732	8.70×10-3	73234
Injury of muscle and tendon at wrist and hand level	UKBB	0.0008533	8.71×10-3	337199
Cause of death: oesophagus, unspecified	UKBB	-0.0247	9.00×10-3	7637
Treatment with buccastem 3mg tablet	UKBB	-0.0003425	9.51×10-3	337159
D, rs141452045
Trait	PMID	Beta	P-value	Samples
Cause of death: heart failure, unspecified	UKBB	-0.06129	3.51×10-14	7637
Cause of death: ill-defined sites within the digestive system	UKBB	-0.06048	1.05×10-9	7637
Cause of death: aortic stenosis	UKBB	-0.07692	4.38×10-9	7637
Seropositive rheumatoid arthritis	UKBB	-0.004088	5.69×10-7	337199
Treatment with amoxicillin	UKBB	-0.0044	4.16×10-6	337159
Cause of death: alcoholic hepatic failure	UKBB	-0.05909	1.05×10-5	7637
Spontaneous rupture of synovium and tendon	UKBB	-0.003593	5.95×10-5	337199
Acute pericarditis	UKBB	-0.002283	1.29×10-4	337199
Acute sinusitis	UKBB	-0.001958	1.61×10-4	337199
Cause of death: chronic obstructive pulmonary disease with acute exacerbation, unspecified	UKBB	-0.05879	1.76×10-4	7637
Treatment with acrivastine	UKBB	-0.001836	3.13×10-4	337159
Treatment with liothyronine	UKBB	-0.00191	3.53×10-4	337159
Treatment with adizem-60 m or r tablet	UKBB	-0.003544	4.12×10-4	337159
Self-reported fracture thumb	UKBB	-0.001927	4.95×10-4	337159
Illnesses of siblings: prostate cancer	UKBB	-0.016	5.28×10-4	260114
Eye problems or disorders: injury or trauma resulting in loss of vision	UKBB	-0.02541	1.04×10-3	108817
Treatment with codeine phosphate+kaolin 10mg or 3g/10ml mixture	UKBB	-0.002051	1.16×10-3	337159
Unspecified abdominal hernia	UKBB	-0.00166	1.28×10-3	337199
Treatment with ferrous salt product	UKBB	-0.001929	1.35×10-3	337159
Average weekly red wine intake	UKBB	0.1054	1.38×10-3	241008
Self-reported enlarged prostate	UKBB	-0.01231	1.41×10-3	337159
Treatment with flu - influenza vaccine	UKBB	-0.002088	1.43×10-3	337159
Dizziness and giddiness	UKBB	-0.005681	1.88×10-3	337199
Nerve root and plexus disorders	UKBB	-0.00186	2.00×10-3	337199
Self-reported lichen sclerosis	UKBB	-0.001872	2.35×10-3	337159
Self-reported fracture shoulder or scapula	UKBB	-0.002309	3.07×10-3	337159
Risk taking	UKBB	-0.0432	3.16×10-3	325821
Long labour	UKBB	-0.005006	3.26×10-3	337199
Treatment with cialis 20mg tablet	UKBB	-0.001817	3.42×10-3	337159
Self-reported essential hypertension	UKBB	-0.006451	4.23×10-3	337159
Treatment with adizem-xl plus m or r capsule	UKBB	-0.002561	4.29×10-3	337159
Treatment with lofepramine	UKBB	-0.002617	4.39×10-3	337159
Self-reported ureteric obstruction or hydronephrosis	UKBB	-0.002474	5.02×10-3	337159
Self-reported femoral hernia	UKBB	-0.00154	5.87×10-3	337159
Chest pain or discomfort when walking uphill or hurrying	UKBB	-0.1178	5.88×10-3	41494
Special screening examination for other diseases and disorders	UKBB	-0.00595	6.60×10-3	337199
Other specific joint derangements	UKBB	-0.004492	7.06×10-3	337199
Treatment with chlorpromazine	UKBB	-0.001552	7.99×10-3	337159
Self-reported thalassaemia	UKBB	-0.0009737	8.36×10-3	337159
Self-reported fibrocystic disease	UKBB	-0.001612	8.82×10-3	337159
Other rheumatoid arthritis	UKBB	-0.004657	9.18×10-3	337199
Cause of death: phlebitis and thrombophlebitis of other deep vessels of lower extremities	UKBB	-0.05566	9.86×10-3	7637
E, rs117153772
Trait	PMID	Beta	P-value	Samples
Cause of death: heart failure, unspecified	UKBB	0.05555	1.11×10-24	7637
Cause of death: thoracic aortic aneurysm, ruptured	UKBB	0.02699	1.07×10-7	7637
Cause of death: hodgkins disease, unspecified	UKBB	0.02361	5.18×10-7	7637
Cause of death: unspecified place	UKBB	0.02699	6.81×10-7	7637
Cause of death: other and unspecified t-cell lymphomas	UKBB	0.02675	3.43×10-6	7637
Urethritis and urethral syndrome	UKBB	0.001571	3.97×10-6	337199
Self-reported benign neuroma	UKBB	0.001963	4.92×10-6	337159
Cause of death: other and unspecified intestinal obstruction	UKBB	0.02288	6.79×10-6	7637
Cause of death: myelodysplastic syndrome, unspecified	UKBB	0.0269	9.44×10-6	7637
Self-reported sarcoma or fibrosarcoma	UKBB	0.002331	3.60×10-5	337159
Ankylosing spondylitis	UKBB	0.00187	4.36×10-5	337199
Cause of death: atrial fibrillation and flutter	UKBB	0.02657	6.54×10-5	7637
Maternal care for known or suspected foetal abnormality and damage	UKBB	0.001451	8.88×10-5	337199
Treatment with tenofovir	UKBB	0.001511	9.27×10-5	337159
Self-reported lichen planus	UKBB	0.001822	2.54×10-4	337159
Other nontraumatic intracranial haemorrhage	UKBB	0.001717	3.47×10-4	337199
Treatment with propranolol	UKBB	0.007059	3.67×10-4	337159
Other disorders of external ear	UKBB	0.00277	5.70×10-4	337199
Treatment with naramig 2.5mg tablet	UKBB	0.002203	7.46×10-4	337159
Treatment with ritonavir	UKBB	0.001017	7.69×10-4	337159
Viral meningitis	UKBB	0.001364	1.08×10-3	337199
Other inflammation of vagina and vulva	UKBB	0.002469	1.10×10-3	337199
Treatment with tetralysal 300 capsule	UKBB	0.001485	2.14×10-3	337159
Insulin-like growth factor 1	28887542	-22.38	2.15×10-3	9961
Treatment with fluticasone	UKBB	0.004944	2.17×10-3	337159
Systemic lupus erythematosus	UKBB	0.001036	2.19×10-3	337199
Malignant neoplasm of bladder	UKBB	0.004012	2.28×10-3	337199
Treatment with efexor 37.5mg tablet	UKBB	0.001666	2.44×10-3	337159
Open wound of lower leg	UKBB	0.001712	2.47×10-3	337199
Treatment with calfovit d3 powder for oral suspension	UKBB	0.0009731	2.74×10-3	337159
Treatment with ismn - isosorbide mononitrate	UKBB	0.001714	2.79×10-3	337159
Treatment with starflower oil	UKBB	0.002924	2.94×10-3	337159
Benign neoplasm of brain and other parts of central nervous system	UKBB	0.001713	3.03×10-3	337199
Cause of death: non-hodgkins lymphoma, unspecified type	UKBB	0.04678	3.05×10-3	7637
Treatment with tildiem 60mg m or r tablet	UKBB	0.003134	3.23×10-3	337159
Other aplastic anaemias	UKBB	0.0009831	3.38×10-3	337199
Treatment with syndol tablet	UKBB	0.001993	3.49×10-3	337159
Carcinoma in situ of breast	UKBB	0.003639	3.66×10-3	337199
Treatment with estradiol product	UKBB	0.002889	3.88×10-3	337159
Self-reported hepatitis c	UKBB	0.0009737	4.26×10-3	337159
Treatment with norethisterone	UKBB	0.001681	4.48×10-3	337159
Treatment with potassium product	UKBB	0.0009722	4.62×10-3	337159
Cause of death: hypertensive heart disease with heart failure	UKBB	0.02543	4.74×10-3	7637
Treatment with timodine cream	UKBB	0.0009691	5.07×10-3	337159
Other aneurysm	UKBB	0.001336	5.20×10-3	337199
Cause of death: cardia	UKBB	0.02456	6.37×10-3	7637
Illnesses of father: heart disease	UKBB	0.03264	6.62×10-3	298237
Treatment with epilim 100mg crushable tablet	UKBB	0.002713	6.70×10-3	337159
Self-reported wegners granulmatosis	UKBB	0.0009604	6.95×10-3	337159
Self-reported cataract	UKBB	0.007505	8.58×10-3	337159
Right eye cataract	UKBB	0.2252	9.04×10-3	3882
Treatment with nuvelle tablet	UKBB	0.001292	9.20×10-3	337159
Treatment with rosiglitazone 1mg or metformin 500mg tablet	UKBB	0.001278	9.46×10-3	337159
Self-reported bronchiectasis	UKBB	0.003114	9.57×10-3	337159
Current employment status: retired	UKBB	-0.03042	9.75×10-3	336252
F, rs7115242
Trait	PMID	Beta	P-value	Samples
Triglycerides	24097068	0.1077	8.10×10-48	177861
Triglycerides	20686565	0.1048	3.33×10-45	96598
Triglycerides	20686565	NA	3.33×10-45	100184
Triglycerides	28334899	0.1059	8.88×10-26	27657
Soluble transferrin receptor	21149283	NA	5.75×10-24	6616
Total cholesterol	20686565	0.0645	1.05×10-15	100184
Total cholesterol	20686565	NA	1.05×10-15	100184
Total cholesterol	24097068	0.0635	3.34×10-15	187365
Triglycerides	19060906	NA	5.21×10-14	19840
Self-reported high cholesterol	UKBB	0.01011	3.82×10-13	337159
Platelet distribution width	27863252	0.04212	2.02×10-11	173480
Age related disease endophenotypes	27790247	NA	1.00×10-10	-
Age related diseases mortality and associated endophenotypes	27790247	NA	1.00×10-9	-
Medication for cholesterol, blood pressure or diabetes: cholesterol lowering medication	UKBB	0.01548	5.28×10-9	154702
Triglycerides	28887542	0.15	5.77×10-9	9961
Treatment with cholesterol lowering medication	UKBB	0.00982	3.91×10-7	180203
Treatment with fenofibrate	UKBB	0.0007836	4.47×10-7	337159
Treatment with atorvastatin	UKBB	0.003578	8.72×10-7	337159
Low density lipoprotein	20686565	0.0393	1.94×10-6	95454
LDL cholesterol	20686565	NA	1.94×10-6	100184
Low density lipoprotein	24097068	0.0392	3.70×10-6	173082
Age completed full time education	UKBB	0.01965	3.76×10-6	226899
Medication for cholesterol, blood pressure or diabetes: none of the above	UKBB	-0.01335	6.68×10-6	154702
Post traumatic stress disorder PTSD	23726511	NA	8.73×10-6	5218
Treatment with simvastatin	UKBB	0.005851	1.40×10-5	337159
No treatment with medication for cholesterol, blood pressure, diabetes, or take exogenous hormones	UKBB	-0.01085	5.81×10-5	180203
High density lipoprotein	24097068	-0.027	5.91×10-5	187167
Red cell distribution width	27863252	-0.02434	8.26×10-5	173480
Treatment with respiratory mometasone	UKBB	0.0003996	9.66×10-5	337159
Qualifications: none	UKBB	-0.006012	1.97×10-4	334070
Treatment with omacor 1g capsule	UKBB	0.0005544	2.00×10-4	337159
Platelet count	27863252	-0.02298	3.08×10-4	173480
Treatment with ismo - isosorbide mononitrate	UKBB	0.0002871	3.17×10-4	337159
Vascular or heart problems diagnosed by doctor: none of the above	UKBB	-0.006983	3.19×10-4	336683
Hematocrit	27863252	-0.02153	4.84×10-4	173480
Treatment with glucose product	UKBB	0.0002215	5.84×10-4	337159
Years of educational attainment	27225129	0.015	6.26×10-4	328917
Self-reported chronic sinusitis	UKBB	0.001131	7.35×10-4	337159
Self-reported hypertension	UKBB	0.006292	7.35×10-4	337159
Inflammatory disorders of male genital organs	UKBB	-0.000223	9.82×10-4	337199
Medication for cholesterol, blood pressure or diabetes: blood pressure medication	UKBB	0.008876	1.10×10-3	154702
Vascular or heart problems diagnosed by doctor: high blood pressure	UKBB	0.006161	1.11×10-3	336683
Standardized difference in height between age 8 years and adult	23449627	0.06502	1.18×10-3	10799
Ever taken oral contraceptive pill	UKBB	0.007125	1.24×10-3	180749
Reticulocyte fraction of red cells	27863252	0.02016	1.30×10-3	173480
Treatment with ramipril	UKBB	0.00287	1.38×10-3	337159
Illnesses of mother: high blood pressure	UKBB	0.006412	1.57×10-3	311681
Treatment with stemetil 5mg tablet	UKBB	0.0003308	1.64×10-3	337159
Total cholesterol	20339536	NA	1.73×10-3	3928
White blood cell count	27863252	-0.01961	1.74×10-3	173480
Coronary artery disease	29212778	0.0252	1.88×10-3	547261
Treatment with codipar caplet	UKBB	0.0001899	1.99×10-3	337159
Waist hip ratio in smokers	28443625	0.0179	2.19×10-3	37517
Cause of death: unspecified dementia	UKBB	0.006638	2.19×10-3	7637
Plateletcrit	27863252	-0.01941	2.38×10-3	173480
Waist hip ratio in smokers	28443625	0.0176	2.54×10-3	40537
Number of treatments or medications taken	UKBB	0.01018	2.80×10-3	337159
Treatment with cipralex 5mg tablet	UKBB	0.0003766	2.89×10-3	337159
Age at first live birth	UKBB	0.02046	2.98×10-3	123846
Rheumatoid arthritis	24390342	-0.1054	3.20×10-3	58284
Self-reported pernicious anaemia	UKBB	0.000688	3.28×10-3	337159
Self-reported fracture upper arm or humerus / elbow	UKBB	0.0005679	3.42×10-3	337159
Treatment with amlodipine	UKBB	0.002444	3.59×10-3	337159
High density lipoprotein	28334899	-0.0278	3.66×10-3	34374
Ulcerative colitis	26192919	-0.1083	3.72×10-3	27432
Years of educational attainment in females	27225129	0.017	3.80×10-3	181443
Total cholesterol	28887542	0.07	3.90×10-3	9961
Total cholesterol	28334899	0.0278	4.00×10-3	33566
Treatment with nexium 20mg tablet	UKBB	0.0005097	4.03×10-3	337159
Morning or evening person	UKBB	0.01199	4.12×10-3	301143
Mean corpuscular hemoglobin concentration	27863252	0.01733	4.18×10-3	173480
Unspecified lump in breast	UKBB	-0.0006562	4.53×10-3	337199
Basophil count	27863252	-0.01735	4.55×10-3	173480
Self-reported whooping cough or pertussis	UKBB	0.0004013	4.57×10-3	337159
Granulocyte count	27863252	-0.01773	4.73×10-3	173480
Myeloid white cell count	27863252	-0.01773	4.86×10-3	173480
Sum neutrophil eosinophil counts	27863252	-0.01764	4.87×10-3	173480
LDL cholesterol	19060906	NA	4.91×10-3	19840
Neoplasm of uncertain or unknown behaviour of middle ear and respiratory and intrathoracic organs	UKBB	0.0001678	4.96×10-3	337199
Treatment with glyceryl trinitrate	UKBB	0.0006676	5.09×10-3	337159
Preschool internalizing problems	24839885	0.1126	5.11×10-3	4596
Illness, injury, bereavement, stress in last 2 years: serious illness, injury or assault of a close relative	UKBB	0.003826	5.15×10-3	335219
Self-reported schizophrenia	UKBB	0.0003785	5.22×10-3	337159
Type II diabetes	28566273	0.056	5.40×10-3	159208
Standardized difference in height between age 8 years and adult in females	23449627	0.07578	5.45×10-3	5756
Faecal incontinence	UKBB	0.0004812	5.50×10-3	337199
Self-reported incisional hernia	UKBB	0.0001655	5.53×10-3	337159
Frequency of unenthusiasm or disinterest in last 2 weeks	UKBB	-0.007306	5.70×10-3	326730
Postpartum care and examination	UKBB	0.0003286	5.73×10-3	337199
Ulcerative colitis	23128233	NA	5.80×10-3	20672
Hemoglobin concentration	27863252	-0.01706	5.88×10-3	173480
Melanoma in situ	UKBB	0.000349	5.93×10-3	337199
Coxarthrosis	UKBB	-0.001408	5.94×10-3	337199
Coronary artery disease	28530674	0.0331	6.04×10-3	217627
Glaucoma	UKBB	-0.0006278	6.29×10-3	337199
Self-reported breast disease	UKBB	0.0002948	6.36×10-3	337159
HDL cholesterol	19060906	NA	6.57×10-3	19840
Adverse effects	UKBB	-0.0003998	6.96×10-3	337199
Self-reported cerebral aneurysm	UKBB	0.0002994	7.00×10-3	337159
Height	UKBB	0.008387	7.16×10-3	336474
Sum eosinophil basophil counts	27863252	-0.01703	7.28×10-3	173480
Cause of death: b-cell lymphoma, unspecified	UKBB	0.005276	7.39×10-3	7637
Rheumatoid arthritis	20453842	NA	7.52×10-3	25708
Rheumatoid arthritis	20453842	-0.1054	7.52×10-3	25712
Treatment with flucloxacillin	UKBB	0.0002104	7.71×10-3	337159
Mean platelet volume	27863252	0.01681	7.81×10-3	173480
log Leptin adjusted for BMI	26833098	0.0215	7.81×10-3	31816
Treatment with flixotide 25micrograms inhaler	UKBB	0.0004596	7.81×10-3	337159
Neutrophil count	27863252	-0.0166	7.98×10-3	173480
Waist hip ratio in male smokers	28443625	0.0205	8.00×10-3	19833
Amyotrophic lateral sclerosis	28931804	-0.02924	8.05×10-3	4084
Treatment with conjugated oestrogens	UKBB	0.0001602	8.14×10-3	337159
Type II diabetes adjusted for BMI	28566273	0.063	8.20×10-3	159208
Treatment with lipantil micro 67mg capsule	UKBB	0.0001643	8.35×10-3	337159
Self-reported other joint disorder	UKBB	-0.0008902	8.45×10-3	337159
Treatment with ezetimibe	UKBB	0.0008608	8.48×10-3	337159
Sum basophil neutrophil counts	27863252	-0.01651	8.49×10-3	173480
Other demyelinating diseases of central nervous system	UKBB	-0.0002539	8.72×10-3	337199
Reproduciblity of spirometry measurement using ers or ats criteria	UKBB	-0.00525	8.86×10-3	255492
Coronary artery disease	28530674	0.028	8.94×10-3	243471
Treatment with bezafibrate	UKBB	0.0003365	9.11×10-3	337159
Reticulocyte count	27863252	0.01634	9.20×10-3	173480
Coronary artery disease	21378990	0.0568	9.23×10-3	84264
Coronary artery disease	23202125	NA	9.23×10-3	194427
Inflammatory bowel disease	26192919	-0.0745	9.26×10-3	34652
Number of unsuccessful stop-smoking attempts	UKBB	-0.0185	9.28×10-3	75135
Self-reported liver failure or cirrhosis	UKBB	0.0002967	9.29×10-3	337159
Polyuria	UKBB	-0.0007039	9.31×10-3	337199
Self-reported heart valve problem or heart murmur	UKBB	0.0009368	9.36×10-3	337159
Other deforming dorsopathies	UKBB	0.0003521	9.38×10-3	337199
Age at last live birth	UKBB	0.01799	9.42×10-3	123676
Treatment with solpadeine tablet	UKBB	0.0001686	9.55×10-3	337159
Alcohol intake versus 10 years previously	UKBB	-0.008396	9.68×10-3	313248
Abnormalities of forces of labour	UKBB	-0.0002369	9.73×10-3	337199
Illnesses of mother: none of the above, group 1	UKBB	-0.005648	9.73×10-3	311264
High density lipoprotein	20686565	-0.0224	9.74×10-3	99900
HDL cholesterol	20686565	NA	9.74×10-3	100184
Ever smoked	UKBB	-0.005372	9.76×10-3	336067
Hayfever, allergic rhinitis or eczema	UKBB	0.004639	9.78×10-3	336782
Arachidic acid 20:0	25378659	NA	9.92×10-3	10129
Body mass index tails	23563607	0.13	1.00×10-2	16068
Rheumatoid arthritis	24390342	-0.05827	1.00×10-2	80799
G, rs113139165
Trait	PMID	Beta	P-value	Samples
Cause of death: heart failure, unspecified	UKBB	0.01161	3.06×10-8	7637
Follicular non-hodgkins lymphoma	UKBB	0.001293	1.11×10-7	337199
Other rheumatoid arthritis	UKBB	0.002297	1.69×10-5	337199
Treatment with fluoxetine	UKBB	0.003923	2.14×10-4	337159
Cause of death: intestinal tract, part unspecified	UKBB	0.02074	4.11×10-4	7637
Treatment with iron+folic acid	UKBB	0.0007716	4.50×10-4	337159
Left eye astigmatism	UKBB	-0.07514	7.58×10-4	8863
Cause of death: non-hodgkins lymphoma, unspecified type	UKBB	0.02032	8.61×10-4	7637
Cause of death: malignant neoplasm of ureter	UKBB	0.007217	1.18×10-3	7637
Self-reported lymphoma	UKBB	0.0005218	1.59×10-3	337159
Diffuse non-hodgkins lymphoma	UKBB	0.0009123	2.11×10-3	337199
Self-reported spinal injury	UKBB	0.00121	2.16×10-3	337159
Cause of death: creutzfeldt-jakob disease	UKBB	0.007137	2.35×10-3	7637
Cause of death: parkinsons disease	UKBB	0.009861	3.72×10-3	7637
Illnesses of siblings: breast cancer	UKBB	-0.00658	3.93×10-3	260387
Dystonia	UKBB	0.0004472	4.37×10-3	337199
Treatment with clobetasol	UKBB	0.000426	4.56×10-3	337159
Left eye hypermetropia	UKBB	-0.03479	4.79×10-3	13923
Treatment with viagra 100mg tablet	UKBB	0.0005151	5.09×10-3	337159
Number of trend entries	UKBB	0.07015	5.28×10-3	49623
Reason former drinker stopped drinking alcohol: financial reasons	UKBB	0.02122	5.33×10-3	11101
Treatment with hydroxocobalamin product	UKBB	0.0004399	5.33×10-3	337159
Treatment with regulan 3.6g or sachet powder	UKBB	0.0004357	5.50×10-3	337159
Complications of procedures	UKBB	-0.002848	5.71×10-3	337199
Treatment with atorvastatin	UKBB	0.004638	6.60×10-3	337159
Longest period of depression	UKBB	-0.07113	6.70×10-3	46884
Hearing aid user	UKBB	0.007557	6.93×10-3	204240
Treatment with gastrocote liquid	UKBB	0.0003834	6.96×10-3	337159
Back pain for 3+ months	UKBB	-0.02493	7.04×10-3	84489
Home area population density: postcode not linkable	UKBB	0.0001612	7.46×10-3	333997
Self-reported menorrhagia	UKBB	0.001378	7.48×10-3	337159
Fractured bone site: wrist	UKBB	-0.003725	7.69×10-3	335546
Pack years of smoking preview only	UKBB	0.04694	7.84×10-3	101726
Injury of eye and orbit	UKBB	0.0004707	8.54×10-3	337199
Treatment with vitamin e product	UKBB	-0.001601	8.68×10-3	337159
Type of tobacco previously smoked: hand-rolled cigarettes	UKBB	0.01271	9.02×10-3	82755
Dizziness and giddiness	UKBB	-0.001408	9.94×10-3	337199
H, rs17223632
Trait	PMID	Beta	P-value	Samples
Self-reported ectopic pregnancy	UKBB	0.00342	3.50×10-9	337159
Treatment with testogel 50mg gel 5g sachet	UKBB	0.001953	1.31×10-6	337159
Cause of death: heart failure, unspecified	UKBB	0.02271	5.66×10-6	7637
Cysts of oral region	UKBB	0.002157	4.67×10-5	337199
Abnormal findings in specimens from male genital organs	UKBB	0.001533	5.68×10-5	337199
Self-reported leukaemia	UKBB	0.001837	7.86×10-5	337159
Vascular or heart problems diagnosed by doctor: none of the above	UKBB	0.0356	2.75×10-4	336683
Treatment with ispaghula husk	UKBB	0.002339	2.88×10-4	337159
Self-reported hypertension	UKBB	-0.03408	2.89×10-4	337159
Treatment with temazepam	UKBB	0.003054	1.59×10-3	337159
Vascular or heart problems diagnosed by doctor: high blood pressure	UKBB	-0.02972	1.82×10-3	336683
Fathers age at death	UKBB	0.07479	2.24×10-3	248726
Trunk fat percentage	UKBB	0.05832	3.04×10-3	331113
Viral warts	UKBB	0.001874	3.55×10-3	337199
Procreative management	UKBB	0.001371	4.03×10-3	337199
Fracture of foot, except ankle	UKBB	0.0023	4.05×10-3	337199
Self-reported ureteric obstruction or hydronephrosis	UKBB	0.001616	4.30×10-3	337159
Self-reported labyrinthitis	UKBB	0.00134	5.09×10-3	337159
Cause of death: urinary tract infection, site not specified	UKBB	0.02137	6.90×10-3	7637
Treatment with ispaghula husk product	UKBB	0.001058	6.93×10-3	337159
Arm fat percentage left	UKBB	0.04351	7.23×10-3	331198
Peritonsillar abscess	UKBB	0.001571	7.25×10-3	337199
Body fat percentage	UKBB	0.04313	8.58×10-3	331117
Treatment with vitamin b compound tablet	UKBB	-0.004722	8.87×10-3	337159
Cause of death: parkinsons disease	UKBB	0.02119	8.96×10-3	7637
Self-reported essential hypertension	UKBB	0.003775	9.14×10-3	337159
I, rs111251321
Trait	PMID	Beta	P-value	Samples
Cause of death: heart failure, unspecified	UKBB	0.02169	3.99×10-10	7637
Treatment with dorzolamide	UKBB	0.001213	2.65×10-6	337159
Chronic sinusitis	UKBB	0.003672	5.15×10-6	337199
Treatment with promethazine product	UKBB	0.0008264	7.76×10-5	337159
Treatment with atorvastatin	UKBB	0.009998	2.11×10-4	337159
Treatment with femara 2.5mg tablet	UKBB	0.0007726	9.70×10-4	337159
Treatment with viagra 100mg tablet	UKBB	0.0008973	2.02×10-3	337159
Ever manic or hyper for 2 days	UKBB	0.01987	2.28×10-3	108734
Dislocation, sprain and strain of joints and ligaments of knee	UKBB	0.001654	2.31×10-3	337199
Self-reported hypopituitarism	UKBB	0.0008896	2.63×10-3	337159
Duration of strenuous sports	UKBB	0.172	3.10×10-3	34342
Treatment with viagra 50mg tablet	UKBB	0.0008919	3.25×10-3	337159
Melanoma in situ	UKBB	0.001368	3.63×10-3	337199
Cause of death: subarachnoid haemorrhage, unspecified	UKBB	0.02827	3.79×10-3	7637
Cause of death: malignant neoplasm of ureter	UKBB	0.01062	3.92×10-3	7637
Treatment with cipralex 5mg tablet	UKBB	0.001331	4.54×10-3	337159
Cause of death: home	UKBB	0.0102	5.61×10-3	7637
Cause of death: other and unspecified t-cell lymphomas	UKBB	0.01009	6.16×10-3	7637
Platelet count	27863252	-0.06529	6.22×10-3	173480
Alkaline phosphatase	28887542	-0.03	6.22×10-3	9961
Self-reported heart failure or pulmonary odema	UKBB	0.001093	6.27×10-3	337159
Cause of death: creutzfeldt-jakob disease	UKBB	0.01059	6.34×10-3	7637
Treatment with care cetirizine hayfever relief 10mg tablet	UKBB	0.0007084	7.60×10-3	337159
Self-reported high cholesterol	UKBB	0.01378	7.64×10-3	337159
Treatment with depakote 250mg e or c tablet	UKBB	0.0007049	8.23×10-3	337159
Other symptoms and signs involving the circulatory and respiratory systems	UKBB	0.001073	8.30×10-3	337199
Treatment with benadryl allergy relief 8mg capsule	UKBB	0.0005651	8.92×10-3	337159
Cause of death: vascular dementia, unspecified	UKBB	0.01059	9.30×10-3	7637
Gingivitis and periodontal diseases	UKBB	0.001251	9.50×10-3	337199
Manic or hyper symptoms: I needed less sleep than usual	UKBB	0.05531	9.51×10-3	22133
Treatment with formoterol	UKBB	0.0006941	9.64×10-3	337159
Plateletcrit	27863252	-0.06187	9.75×10-3	173480
Illnesses of mother: chronic bronchitis or emphysema	UKBB	-0.009741	9.88×10-3	309793
